# Supplementary material for: Complementary Functions of Plant AP Endonucleases and AP Lyases during DNA Repair of Abasic Sites Arising from C:G Base Pairs
Source: MDPI journal article supplement (doi:10.3390/ijms22168763), 2021-08-16
Supplement: s1 [file s1]

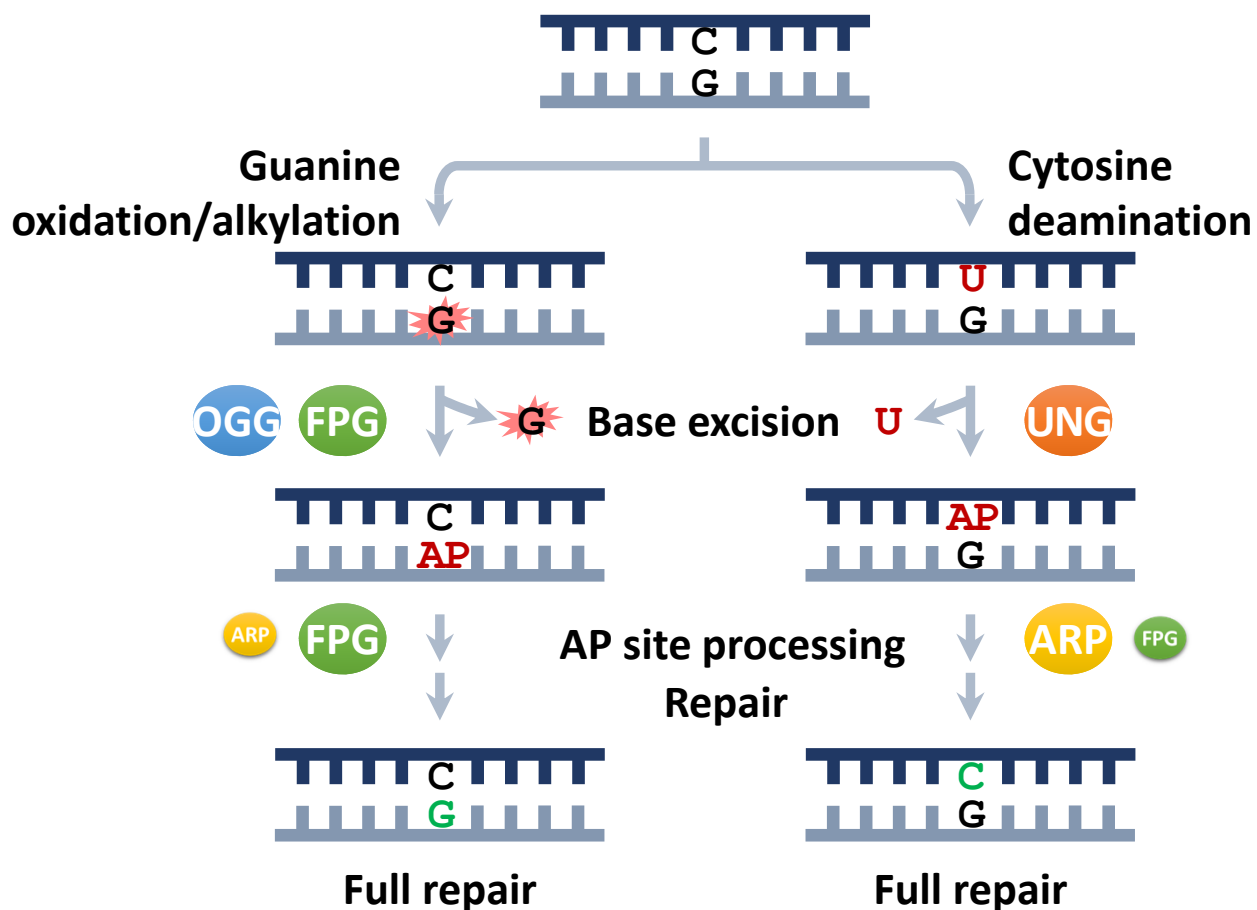

**Supplementary Figure S1.** Model for repair of AP sites arising from C:G pairs in plants. ARP preferentially repaired AP sites arising from cytosine deamination, whereas FPG favoured those derived from guanine oxidation or alkylation. See text for details.

**Supplementary Table S1.** Probability of methylation of DNA substrates used depending on the orphan base opposite the AP site.

| Sequence Context | Orphan Base | Sequence                              | Probability of Methylation <sup>a</sup> |        |
|------------------|-------------|---------------------------------------|-----------------------------------------|--------|
|                  |             |                                       | Plants                                  | Humans |
| A                | G           | TCG <u>A</u> PCCG<br>AGC <b>G</b> GGC | Low                                     | Low    |
| B                | G           | CGC <u>A</u> PCGT<br>GCG <b>G</b> GCA | Medium                                  | Low    |
| C                | G           | TCG <u>A</u> PGCG<br>AGC <b>G</b> CGC | High                                    | High   |
| A                | C           | TCG <u>A</u> PCCG<br>AGC <u>C</u> GGC | Medium                                  | Low    |
| B                | C           | CGC <u>A</u> PCGT<br>GCG <u>C</u> GCA | High                                    | High   |
| C                | C           | TCG <u>A</u> PGCG<br>AGC <u>C</u> CGC | Medium                                  | Low    |

<sup>a</sup> Probability of cytosine methylation at the underlined position.

**Supplementary Table S2.** Relative efficiency of native enzymes from *Arabidopsis* on DNA substrates with an AP site in three different sequence contexts and opposite G or C as the orphan base.

| Enzyme | Sequence Context | Orphan Base | P <sub>max</sub> (nM) | T <sub>50</sub> (min) | E <sub>rel</sub>  |
|--------|------------------|-------------|-----------------------|-----------------------|-------------------|
| ARP    | A                | G           | 19.40 ± 0.11          | 6.27                  | 3.10 ± 0.02       |
| ARP    | A                | C           | 19.01 ± 1.84          | 97.63                 | 0.19 ± 0.02       |
| ARP    | B                | G           | 19.17 ± 0.28          | 13.92                 | 1.38 ± 0.02       |
| ARP    | B                | C           | 19.21 ± 0.24          | 25.48                 | 0.75 ± 0.01       |
| ARP    | C                | G           | 19.43 ± 0.12          | 6.66                  | 2.91 ± 0.02       |
| ARP    | C                | C           | 18.55 ± 0.76          | 49.16                 | 0.38 ± 0.02       |
| FPG    | A                | G           | 12.37 ± 0.97          | 88.87                 | 0.14 ± 0.01       |
| FPG    | A                | C           | 15.88 ± 0.93          | 68.63                 | 0.23 ± 0.01       |
| FPG    | B                | G           | n.d. <sup>a</sup>     | n.a. <sup>b</sup>     | n.a. <sup>b</sup> |
| FPG    | B                | C           | 16.10 ± 0.39          | 50.23                 | 0.32 ± 0.01       |
| FPG    | C                | G           | 7.82 ± 0.33           | 74.53                 | 0.10 ± 0.00       |
| FPG    | C                | C           | 6.65 ± 0.17           | 94.95                 | 0.07 ± 0.00       |

<sup>a</sup> n.d.–not determined. <sup>b</sup> n.a.–not applicable.

**Supplementary Table S3.** Relative efficiency of recombinant or native human APE1 on DNA substrates with an AP site in three different sequence contexts and opposite G or C as the orphan base.

| APE1        | Sequence Context | Orphan Base | P <sub>max</sub> (nM) | T <sub>50</sub> (min) | E <sub>rel</sub> |
|-------------|------------------|-------------|-----------------------|-----------------------|------------------|
| Recombinant | A                | G           | 78.11 ± 0.93          | 8.55                  | 9.14 ± 0.11      |
| Recombinant | A                | C           | 78.70 ± 0.53          | 8.55                  | 9.21 ± 0.06      |
| Recombinant | B                | G           | 77.95 ± 0.60          | 9.71                  | 8.03 ± 0.06      |
| Recombinant | B                | C           | 81.16 ± 0.85          | 17.37                 | 4.67 ± 0.05      |
| Recombinant | C                | G           | 76.84 ± 1.63          | 15.40                 | 4.99 ± 0.11      |
| Recombinant | C                | C           | 77.49 ± 1.69          | 15.86                 | 4.89 ± 0.11      |
| Native      | A                | G           | 19.32 ± 0.03          | 3.41                  | 5.67 ± 0.01      |
| Native      | A                | C           | 19.54 ± 0.17          | 5.48                  | 3.56 ± 0.03      |
| Native      | B                | G           | 18.98 ± 0.31          | 8.15                  | 2.33 ± 0.04      |
| Native      | B                | C           | 19.18 ± 0.64          | 21.94                 | 0.87 ± 0.03      |
| Native      | C                | G           | 19.20 ± 0.44          | 14.75                 | 1.30 ± 0.03      |
| Native      | C                | C           | 19.38 ± 0.47          | 19.25                 | 1.01 ± 0.02      |
